# Supplementary material for: Encapsulation of crystalline and amorphous Sb2S3 within carbon and boron nitride nanotubes
Source: Royal Society of Chemistry journal article supplement (doi:10.1039/d4sc01477d), 2024-01-01
Supplement: d4sc01477d1.pdf [file d4sc01477d1.pdf]

**Supporting Information for**  
**Encapsulation of Crystalline and Amorphous Sb<sub>2</sub>S<sub>3</sub> within Carbon and Boron Nitride Nanotubes**

Griffin M. Milligan,<sup>1</sup> Dmitri Leo Mesoza Cordova,<sup>1</sup> Ze-Fan Yao,<sup>2</sup> Brian Y. Zhi,<sup>1</sup> Lyndsey R. Scammell,<sup>3</sup>  
Toshihiro Aoki,<sup>4</sup> Maxx Q. Arguilla<sup>1\*</sup>

<sup>1</sup>Department of Chemistry, University of California Irvine; Irvine, California 92697, USA

<sup>2</sup>Department of Chemical and Biomolecular Engineering, University of California Irvine; Irvine, California  
92697, USA

<sup>3</sup>BNNT LLC, 300 Ed Wright Lane Suite A, Newport News, Virginia 23606, United States

<sup>4</sup>Irvine Materials Research Institute, University of California Irvine; Irvine, California 92697, USA

\*Corresponding author. Email: [marguill@uci.edu](mailto:marguill@uci.edu)

## 1. Materials and Methods

**General Methods.** Structures were generated in SingleCrystal 4 software (CrystalMaker® Software Suite). Carbon nanotubes were generated in Avogadro: an open-source molecular builder and visualization tool. Version 1.2.0. <http://avogadro.cc/>,<sup>1</sup> while boron nitride nanotubes were generated in VMD.<sup>2</sup> Calibrated optical images of representative crystals were taken with a Google Pixel 6. All figures were lay-outed and processed in Lunacy.

**Synthesis of bulk Sb<sub>2</sub>S<sub>3</sub> Precursors.** Elemental precursors of antimony (99.5 %) and sulfur (99+%) were purchased from STREM and used without further purification. Bulk Sb<sub>2</sub>S<sub>3</sub> crystals that were used as precursors for subsequent syntheses were grown as follows: Stoichiometric quantities of Sb and S (2:3 ratio) were evacuated in quartz ampoules (10 mm I.D.; 12 mm O.D.) under a <50 mTorr base pressure and were subsequently flame sealed. The ampoules were then uniformly heated to 600 °C for 96 hours in a single-zone vertical tube furnace (OTF-1200F; MTI Inc.) then cooled over the course of 48 hours. The phase purity of the Sb<sub>2</sub>S<sub>3</sub> polycrystals were confirmed by powder X-ray diffraction (PXR) on a Rigaku MiniFlex diffractometer (**Fig. S1**). The resulting diffractogram was compared to the reported literature structure.<sup>3</sup>

**Encapsulation of Sb<sub>2</sub>S<sub>3</sub> within SWCNTs, MWCNTs, & BNNTs.** High purity single-walled carbon nanotubes (1.6 ± 0.4 nm diameter, Tuball, OCSiAl) were opened by heating the as-received nanotubes at 420 °C in ambient air conditions for five hours. 10-20 nm multi-walled carbon nanotubes (Cheap Tubes Inc.) were heat treated at 420 °C for five to ten hours. Purified and treated (to open the ends) boron nitride nanotubes (BNNT LLC) were filled with Sb<sub>2</sub>S<sub>3</sub> without an oxidation step. A calcination step at 800 °C or stirring in aqua regia (3:1 conc. HCl/conc. HNO<sub>3</sub>) was found to make no considerable difference. Approximately 5 mg of these pre-treated NTs were then loaded into quartz ampoules immediately after heat treatment (10 mm I.D.; 12 mm O.D.) and mixed with a large excess of powdered Sb<sub>2</sub>S<sub>3</sub> polycrystals, ranging from 200 to 300 mg. Ampoules containing NTs and Sb<sub>2</sub>S<sub>3</sub> powders were evacuated under vacuum <50 mTorr and were immediately flame sealed. The ampoules were then heated to 600 °C for 96 hours in a single-zone vertical tube furnace (OTF-1200F; MTI Inc.) then cooled over the course of 48 hours. After the reaction, the Sb<sub>2</sub>S<sub>3</sub>@NTs were found to have phase separated from the Sb<sub>2</sub>S<sub>3</sub> melt. The Sb<sub>2</sub>S<sub>3</sub>@NTs were physically isolated from the resulting Sb<sub>2</sub>S<sub>3</sub> boule and were used in the succeeding experiments without further purification. Prior to ensemble measurements, the as-synthesized samples were washed and purified using isopropanol *via* a mixture of gentle pipetting, vortex mixing, and bath sonication and dried in a vacuum oven at 80 °C for at least one hour.

**High-resolution transmission electron microscopy (HRTEM), scanning transmission electron microscopy (STEM), and elemental mapping.** The resulting Sb<sub>2</sub>S<sub>3</sub>@NT heterostructures were dispersed in isopropanol (*i*-PrOH, 99.8%, Fisher Scientific) first gently suspending manually by pipetting several times before bath sonication for 5 mins, then drop-casted onto lacey carbon grids (Lacey Formvar/Carbon, 200 mesh, Cu grid; Ted Pella, Inc.) HRTEM images were acquired using a JEOL JEM-2800 S/TEM operated at an accelerating voltage of 200 kV equipped with a Gatan OneView 4K camera with drift correction. EDS mapping of Sb<sub>2</sub>S<sub>3</sub>@BNNTs was performed with the same microscope in STEM mode using dual 100 mm<sup>2</sup> Si drift detectors. C<sub>s</sub>-corrected scanning transmission electron microscopy (STEM) images and energy-dispersive X-ray spectra (EDS) of Sb<sub>2</sub>S<sub>3</sub>@SWCNTs was collected using a JEOL JEM-ARM300F Grand Arm electron microscope also equipped with dual 100 mm<sup>2</sup> Si drift detectors operated at 80 kV. Post-processing and image analyses of raw HRTEM and STEM data (.dm4) were done in Digital Micrograph (Gatan). Fast Fourier transform (FFT) analyses of the micrographs were done in Fiji.<sup>4</sup> Indexing of the FFT data were performed by comparing the experimental patterns with simulated patterns of the bulk single crystal structure using the SingleCrystal 4 software (CrystalMaker® Software Suite). HRTEM images were simulated using cITEM.<sup>5</sup>

**Raman Spectroscopy.** Raman spectra were collected on a Horiba LabRAM HR Evolution with a 532 nm laser. Samples were prepared by dispersing Sb<sub>2</sub>S<sub>3</sub>@NTs in *i*-PrOH, sonicating for 5 to 20 mins, then drop-casting onto

SiO<sub>2</sub>/Si substrate. Carbon nanotube G-bands were assessed by peak fitting in MagicPlot Pro with two Lorentzian peaks and a spline background. Peak maxima of filled and empty MWCNTs and SWCNTs were extracted and compared. The broadening of the G-bands was assessed by extracting the full width at half maximum (FWHM) of each peak.

**Diffuse Reflectance Spectroscopy (DRS).** Composite samples for DRS measurements were prepared by individually grinding Sb<sub>2</sub>S<sub>3</sub>@NTs, empty NTs, and bulk Sb<sub>2</sub>S<sub>3</sub> crystals with spectroscopic grade potassium bromide (KBr, >99% trace metal basis, Sigma Aldrich). These dilute samples were packed and compressed onto a custom-made holder with a transparent quartz window. DRS measurements on these as-prepared samples were performed on a Jasco V-670 spectrometer equipped with a 60 mm integrating sphere (Jasco ISN-923) which operates at a working range of 190-2500 nm. The resulting diffuse reflectance spectra were converted using the Kubelka-Munk function ( $F(R_{\infty})$ ) to approximate the absorbance profiles of the samples.<sup>6</sup>

**Ultraviolet-Visible (UV-Vis) Absorbance Spectroscopy.** Individual suspensions of Sb<sub>2</sub>S<sub>3</sub>@BNNTs and empty BNNTs were prepared by sonicating the samples in *i*-PrOH for 5-20 mins. Immediately after sonication, room temperature absorption spectra of the resulting suspensions in the 200 nm to 800 nm range were collected using Agilent Cary 100 UV-Vis spectrophotometer. Pure *i*-PrOH was used as a blank solution for these measurements.

**First-principles density functional theory calculations of the Sb<sub>2</sub>S<sub>3</sub>@SWCNT<sub>(21,0)</sub> and Sb<sub>2</sub>S<sub>3</sub>@SWBNNT<sub>(21,0)</sub> heterostructures.** DFT calculations were performed to determine the electron density difference map of a single chain of Sb<sub>2</sub>S<sub>3</sub> encapsulated within a (21,0) zig-zag SWCNT and SWBNNT. This (n,m) index falls within the suitable diameter (~1.6 nm) experimentally observed to house single covalent chains of Sb<sub>2</sub>S<sub>3</sub>. All DFT calculations were conducted using the Cambridge Serial Total Energy Package, CASTEP academic 22.11 release.<sup>7</sup> Generalized gradient approximation (GGA) with Perdew-Burke-Ernzerhof (PBE) parametrization and Grimme's DFT-D2 van der Waals force correction were used with on-the-fly generation (OTFG) ultrasoft pseudopotentials.<sup>8,9</sup> Real-space mesh cut-off of 550 eV was used for all DFT calculations. A periodic-boundary-condition (PBC) supercell of a single chain of Sb<sub>2</sub>S<sub>3</sub> in a (21,0) SWCNT or SWBNNT was built where the long-axis ([010] direction) of the Sb<sub>2</sub>S<sub>3</sub> chain was aligned to the *z*-axis of the CNT. The supercells that were constructed consisted of two-unit cell lengths along the crystallographic [010] direction of the Sb<sub>2</sub>S<sub>3</sub> crystal structure to minimize the incommensurate lattice mismatch between the Sb<sub>2</sub>S<sub>3</sub> and the SWCNT/SWBNNT. The supercell system was then energy minimized using Monkhorst-Pack *k*-point mesh at Gamma until the total energies converged to 10<sup>-5</sup> eV per atom and displacements less than 0.001 Å. The electron density difference map was calculated using the optimized geometry with Monkhorst-Pack *k*-point mesh of 1×1×15. Bader atomic charges of the systems were calculated using electron density from the final single-point CASTEP calculation with the help of den2VASP and Bader charge analysis codes.<sup>10,11</sup>

**X-Ray Photoelectron Spectroscopy (XPS).** XPS samples were prepared by adhering a large quantity of nanotubes (in the case of Sb<sub>2</sub>S<sub>3</sub>@SWCNT, Sb<sub>2</sub>S<sub>3</sub>@BNNT, SWCNT, and BNNT) or single crystals of Sb<sub>2</sub>S<sub>3</sub> to a plane dual height holder with carbon tape. Spectra were collected on a Kratos Analytical Axis Supra with an Al/Ag monochromated X-ray source and charge neutralizer. Peaks were fit in CasaXPS software using a spline Shirley background and asymmetric Lorentzian peaks. Samples without CNTs were calibrated to adventitious carbon 1s at 284.8 eV, while CNT rich samples were calibrated to the strong graphitic C=C peak at 284.5 eV.<sup>12</sup>

**Thermogravimetric Analysis (TGA).** TGA was collected on a TA Instruments TGA Q500 with a nitrogen purge at a ramp rate of 20 °C/min from room temperature to 1000 °C.

**Electrical Measurements.** Samples were pressed into pellets at 14 MPa between circular disks cut from a weigh boat to aid in liftoff. Rectangular sections (Sb<sub>2</sub>S<sub>3</sub>@BNNT: l=0.168 cm, A=0.269 x 0.0295 cm = 0.00796 cm<sup>2</sup>; empty BNNT: l=0.136 A=0.264 x 0.0242 cm = 0.00637 cm<sup>2</sup>) taken from these pellets and were contacted with pressed indium contacts. Current-voltage (I-V) curves and time-dependent current profiles measured with a forward bias of

10 V were measured using a probe station equipped with a Keithley 4200 SCS semiconductor parameter analyzer. For photocurrent generation measurements, the fabricated devices were illuminated by a Prizmatix 415-nm FC-LED light source at  $13 \text{ mW/cm}^2$  controlled by a programmable pulse generator at 0.5 Hz with a 1 s exposure time.

## 2. Supplementary Data and Results

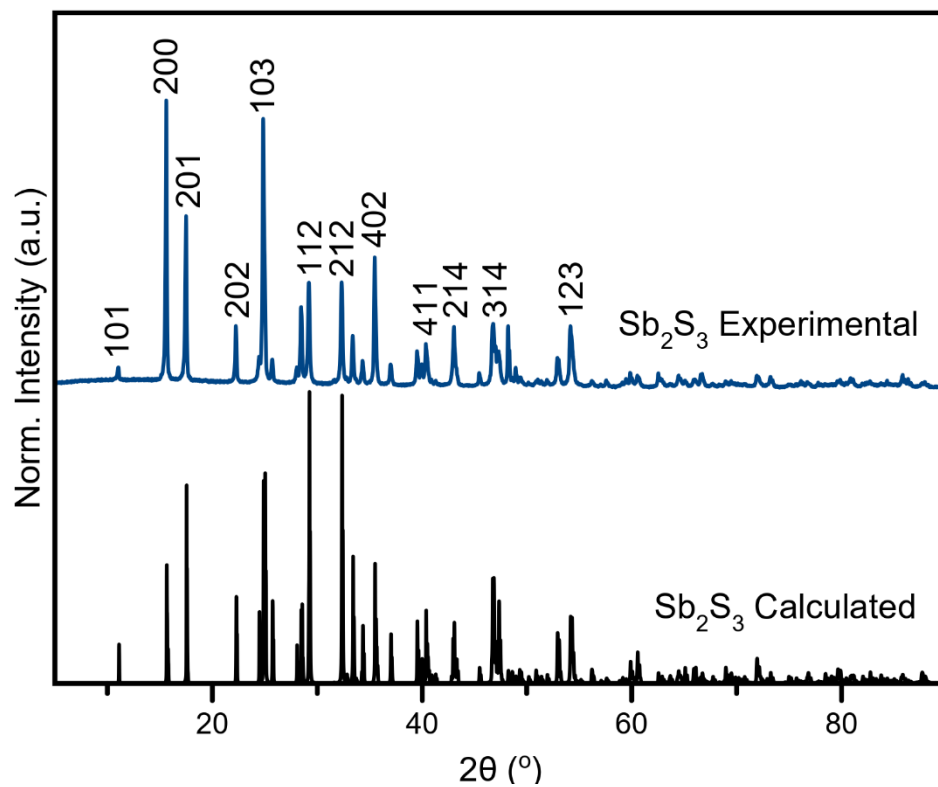

**Figure S1.** PXRD of bulk  $\text{Sb}_2\text{S}_3$  powder used to fill MWCNTs, SWCNTs, and BNNTs in the study.

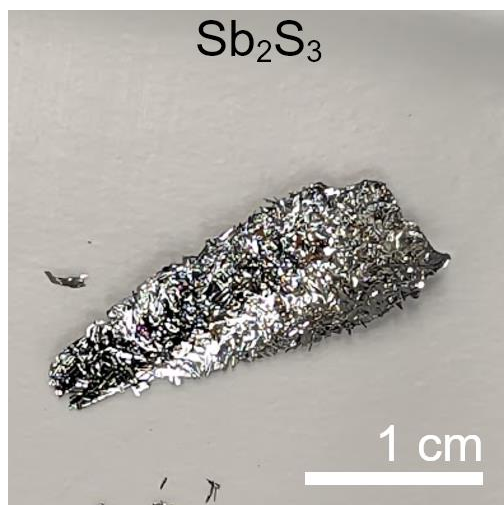

**Figure S2.** Optical image of gray  $\text{Sb}_2\text{S}_3$  polycrystals used to fill carbon and boron nitride nanotubes.

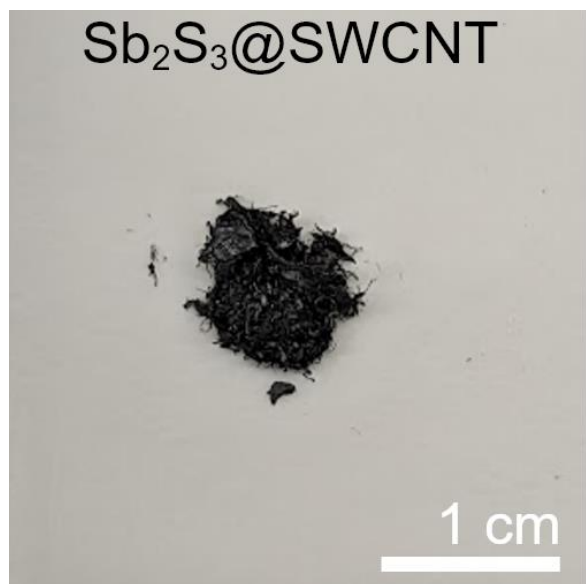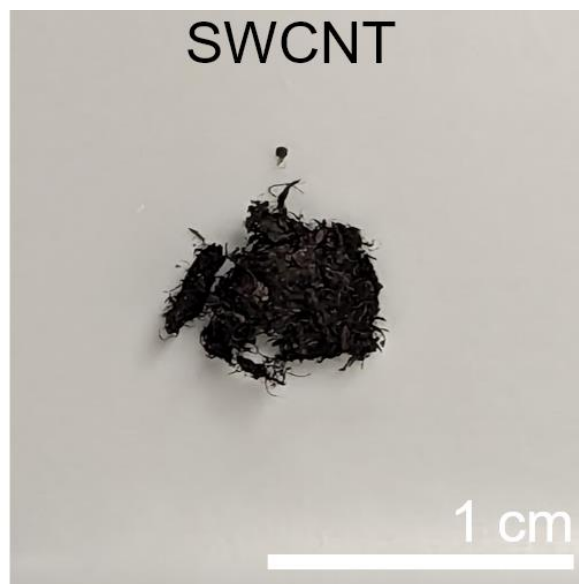

**Figure S3.** Optical image of black Sb<sub>2</sub>S<sub>3</sub>@SWCNTs (left) and black empty SWCNTs fibers (right).

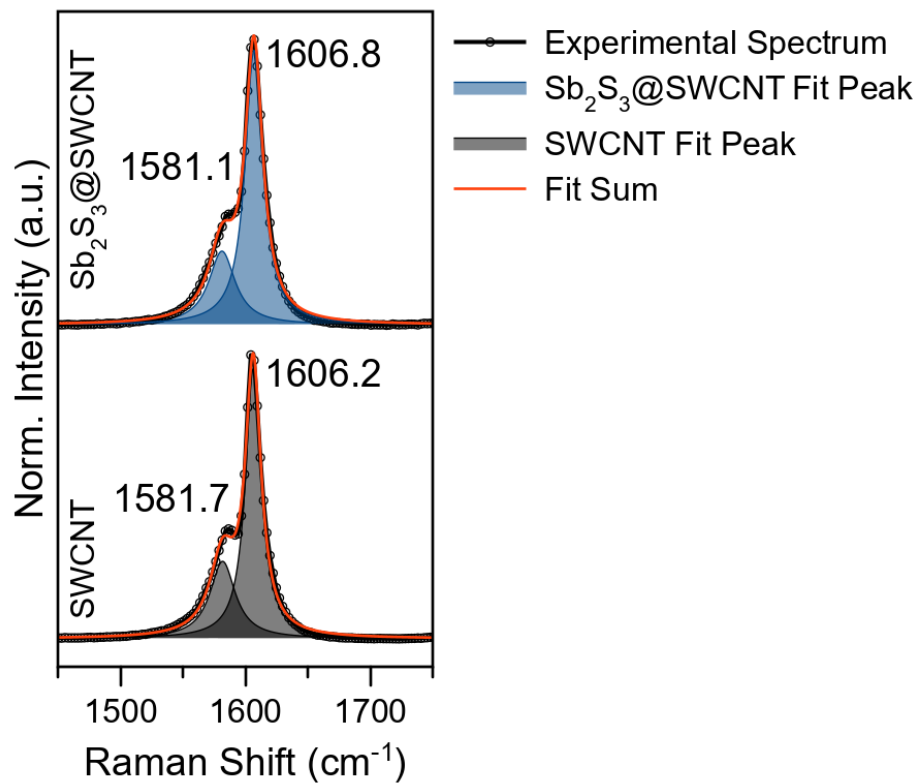

**Figure S4.** Raman peak fit of G-band region of  $\text{Sb}_2\text{S}_3@\text{SWCNT}$  and SWCNT spectrum with negligible shifts and negligible peak broadening.



**Table S1.** FWHM values of fitted Raman peaks from **Fig. S4**.

| <b>Sample</b>                                        | <b>Peak Position<br/>(<math>\text{cm}^{-1}</math>)</b> | <b>FWHM<br/>(<math>\text{cm}^{-1}</math>)</b> |
|------------------------------------------------------|--------------------------------------------------------|-----------------------------------------------|
| Sb <sub>2</sub> S <sub>3</sub> @SWCNT G <sup>-</sup> | 1581.1 ± 0.4                                           | 25.7 ± 1.3                                    |
| SWCNT G <sup>-</sup>                                 | 1581.7 ± 0.3                                           | 24.6 ± 1.0                                    |
| Sb <sub>2</sub> S <sub>3</sub> @SWCNT G <sup>+</sup> | 1606.8 ± 0.1                                           | 17.2 ± 0.3                                    |
| SWCNT G <sup>+</sup>                                 | 1606.2 ± 0.2                                           | 15.3 ± 0.2                                    |

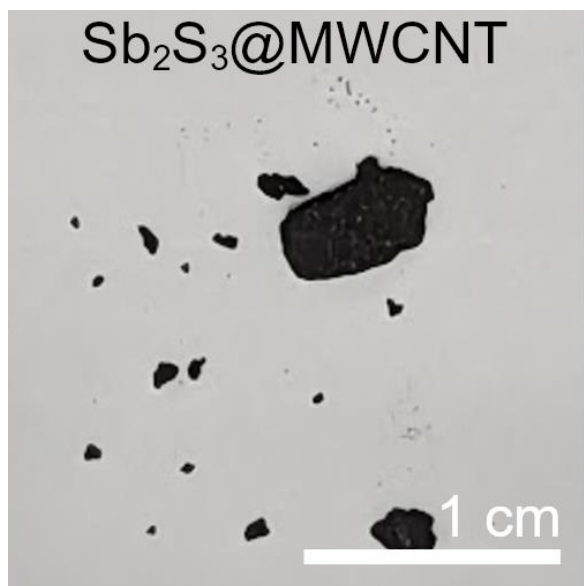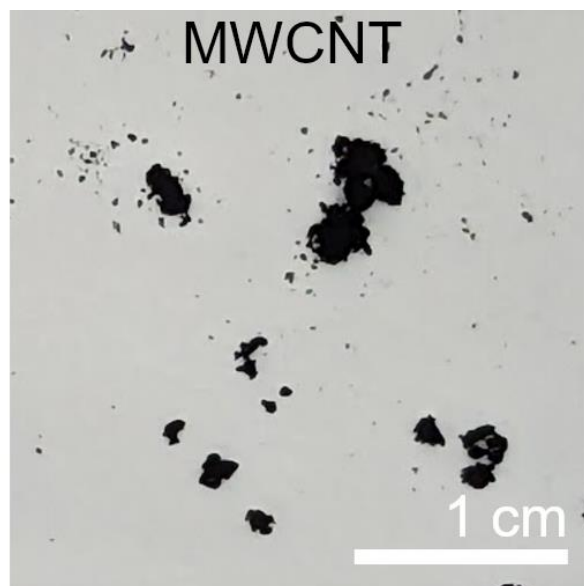

**Figure S5.** Optical images of black Sb<sub>2</sub>S<sub>3</sub>@MWCNT (left) and black empty MWCNT powders (right).

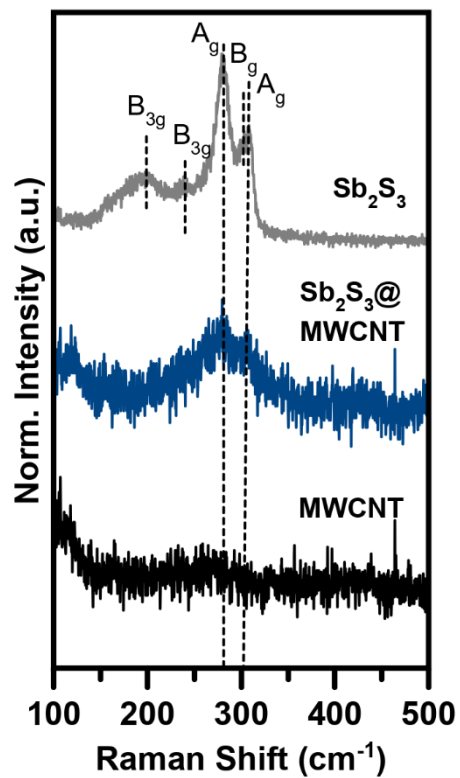

**Figure S6.** Raman spectrum of the low wavenumber region of Sb<sub>2</sub>S<sub>3</sub>@MWCNTs, Sb<sub>2</sub>S<sub>3</sub>, and MWCNTs showing both A<sub>g</sub> peaks remain visible despite confinement effects.

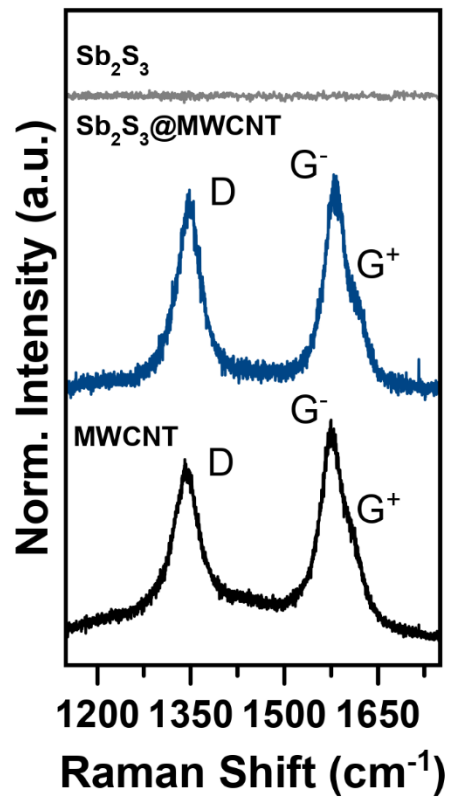

**Figure S7.** Raman spectrum of the high wavenumber region of  $\text{Sb}_2\text{S}_3@\text{MWCNT}$ s,  $\text{Sb}_2\text{S}_3$ , and MWCNTs.

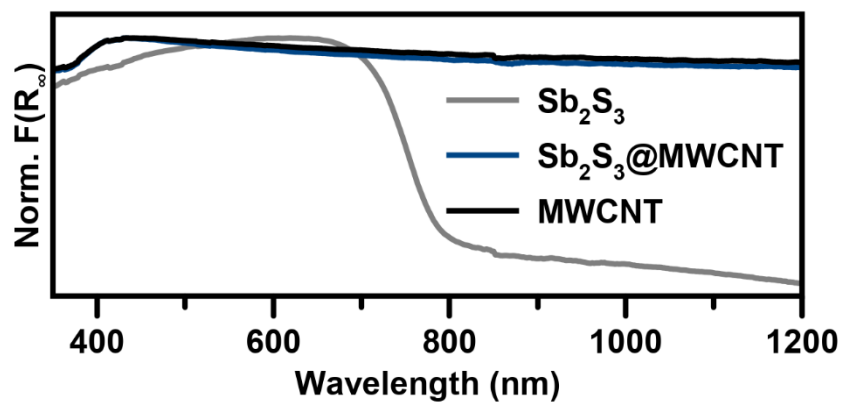

**Figure S8.** DRS of Sb<sub>2</sub>S<sub>3</sub>@MWCNTs, Sb<sub>2</sub>S<sub>3</sub>, and MWCNTs showing that, as with SWCNTs, broadband absorbance of MWCNTs create difficulties when attempting to measure the optical properties of a guest material.

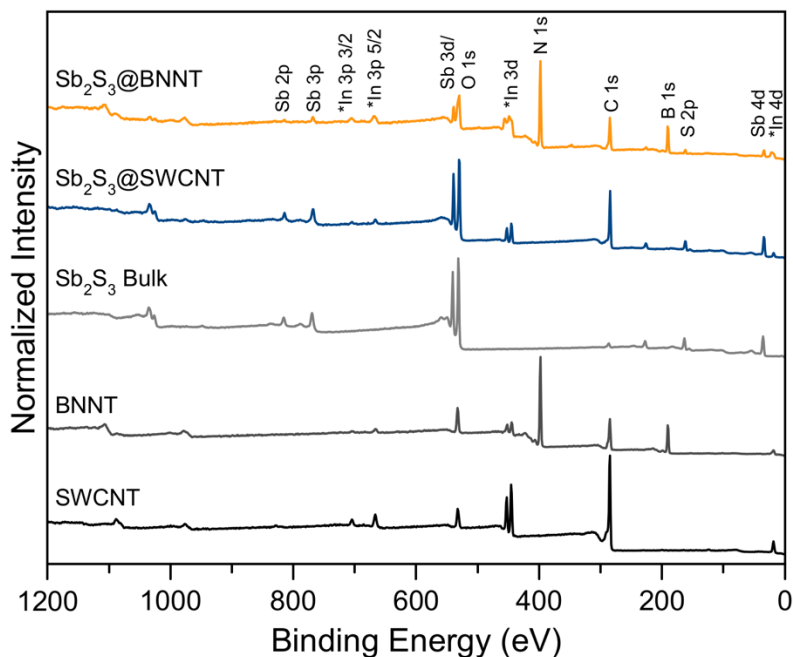

**Figure S9.** Wide range XPS survey of  $\text{Sb}_2\text{S}_3$  in bulk and encapsulated form in BNNTs and SWCNTs. Initially, In powder (\*) was spiked into the sample to serve as an external calibration as some samples contained carbon while others did not. Unfortunately, charge neutralizer overcompensation in insulating samples ( $\text{Sb}_2\text{S}_3$  bulk crystal, empty BNNTs) calibrated to In  $3d$  displayed erratic values several eV above literature. Instead, following literature procedures, samples that did not contain graphitic carbon (a- $\text{Sb}_2\text{S}_3$ @BNNT,  $\text{Sb}_2\text{S}_3$ , BNNTs) were calibrated to the C  $1s$  of the adventitious carbon peak at 284.8 eV while graphitic carbon-containing samples (c- $\text{Sb}_2\text{S}_3$ @SWCNT, empty SWCNTs) were calibrated to the sharp C  $1s$  peak at 284.5 eV.<sup>12</sup> This calibration appeared to arrive at the most reasonable values and is consistent with literature for fitting of adventitious and graphitic carbon samples.

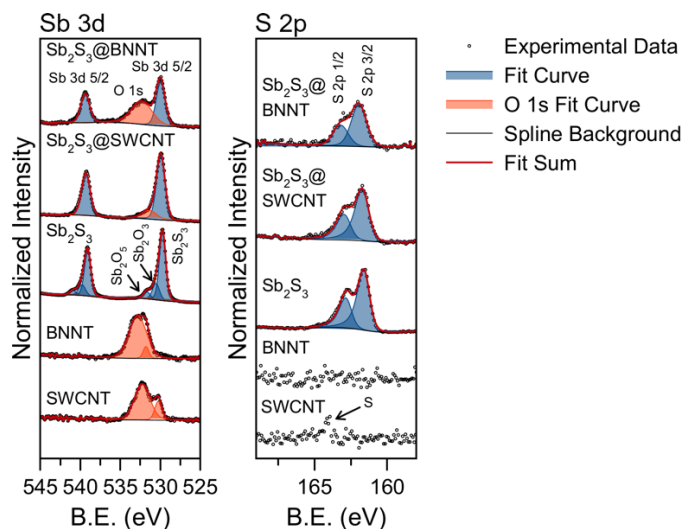

**Figure S10.** Regional XPS of Sb 3*d* and S 2*p* peaks. Sb 3*d*<sub>5/2</sub> peaks overlap with O 1*s*, which is colored red for clarity. It can be observed that only one Sb<sup>3+</sup> environment is present in both the @BNNT and @SWCNT samples when compared to the three Sb types in bulk Sb<sub>2</sub>S<sub>3</sub>, which contains a prominent peak of Sb<sub>2</sub>S<sub>3</sub> but also two Sb oxide peaks, one for Sb<sub>2</sub>O<sub>3</sub> and one for Sb<sub>2</sub>O<sub>5</sub>. This indicates the nanotubes may offer some protection against oxidation at room temperature. Only one S environment is observed in a-Sb<sub>2</sub>S<sub>3</sub>@BNNT, c-Sb<sub>2</sub>S<sub>3</sub>@SWCNT, and bulk Sb<sub>2</sub>S<sub>3</sub>. Empty SWCNTs showed a minor S impurity peak likely from cross contamination during sample preparation.

**Table S2** Fit XPS values of Sb 3d and S 2p.

| <b>Sb<sub>2</sub>S<sub>3</sub>@BNNT</b>        | Sb 3d 5/2 | Sb 3d 3/2 | S 2p 3/2 | S 2p 1/2 |
|------------------------------------------------|-----------|-----------|----------|----------|
| Peak position (eV)                             | 529.97    | 539.40    | 161.95   | 163.20   |
| FWHM (eV)                                      | 1.3       | 1.3       | 1.24     | 1.24     |
| Area                                           | 10580.5   | 7053.67   | 1209.82  | 604.91   |
| <b>Sb<sub>2</sub>S<sub>3</sub>@SWCNT</b>       | Sb 3d 5/2 | Sb 3d 3/2 | S 2p 3/2 | S 2p 1/2 |
| Peak position (eV)                             | 529.95    | 539.31    | 161.67   | 162.92   |
| FWHM (eV)                                      | 1.26      | 1.26      | 1.05     | 1.05     |
| Area                                           | 41908.22  | 27938.81  | 4137.23  | 2068.61  |
| <b>Sb<sub>2</sub>S<sub>3</sub> Bulk</b>        | Sb 3d 5/2 | Sb 3d 3/2 | S 2p 3/2 | S 2p 1/2 |
| Peak position (eV)                             | 529.72    | 539.08    | 161.57   | 162.81   |
| FWHM (eV)                                      | 0.95      | 0.95      | 0.94     | 0.94     |
| Area                                           | 64530.09  | 42589.86  | 7604.04  | 3802.02  |
| <b>Sb<sub>2</sub>O<sub>3</sub> (from bulk)</b> | Sb 3d 5/2 | Sb 3d 3/2 |          |          |
| Peak position (eV)                             | 530.54    | 539.79    |          |          |
| FWHM (eV)                                      | 1.04      | 1.04      |          |          |
| Area                                           | 17096.58  | 11283.74  |          |          |
| <b>Sb<sub>2</sub>O<sub>5</sub> (from bulk)</b> | Sb 3d 5/2 | Sb 3d 3/2 |          |          |
| Peak position (eV)                             | 531.63    | 540.89    |          |          |
| FWHM (eV)                                      | 0.92      | 0.92      |          |          |
| Area                                           | 6346.11   | 4188.43   |          |          |



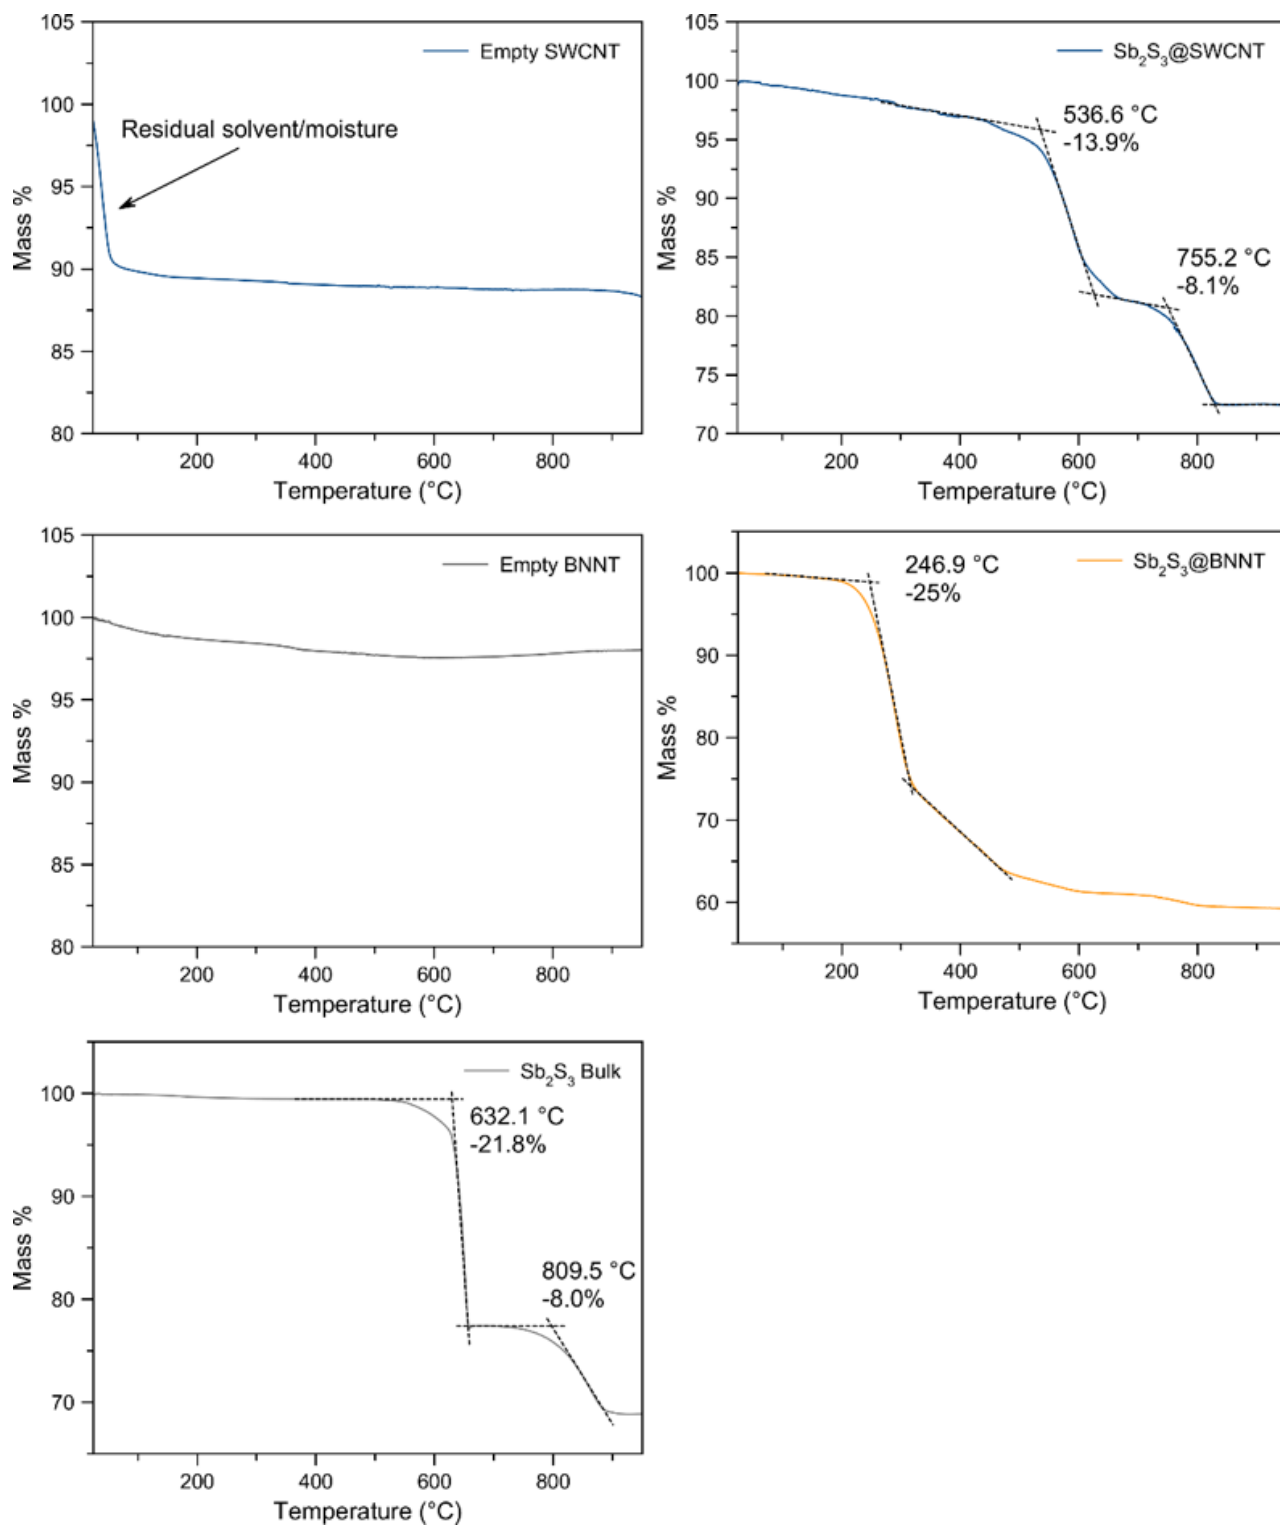

**Figure S11.** TGA curves of SWCNTs, c- $Sb_2S_3@SWCNTs$ , BNNTs, a- $Sb_2S_3@BNNTs$ , and bulk  $Sb_2S_3$  with nitrogen purge.

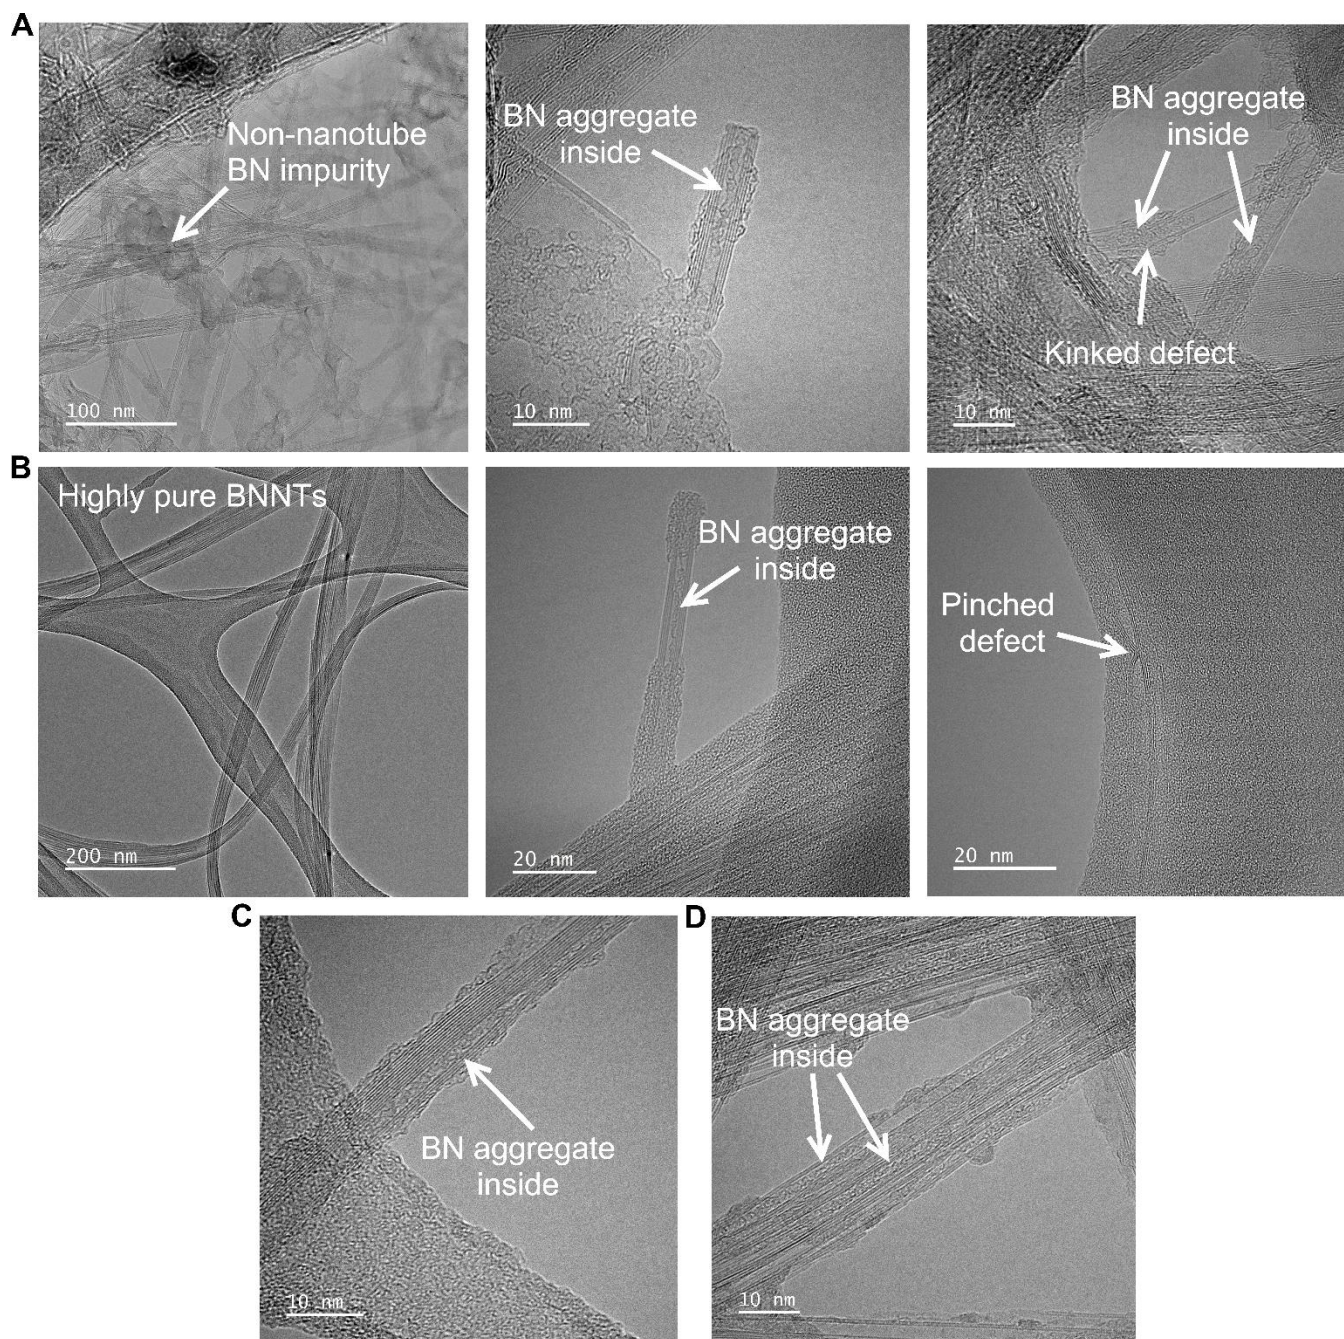

**Figure S12.** Representative HRTEM images of empty BNNTs. (A) Purified and treated (to open ends) BNNTs, which contained defects, BN aggregate filling within BNNTs, and a high quantity of non-nanotube BN outside of the nanotubes. (B) High purity BNNTs exposed to a proprietary purification process (BNNT LLC) much longer than the nanotubes used in this study with no non-nanotube material remaining outside the BNNTs. BN aggregates remained inside the nanotubes. (C) High purity nanotubes from B which were additionally exposed to calcination at 800 °C for 5 hours, after which BN aggregate filling remained. (D) High purity nanotubes from B which were first washed in aqua regia for 5 hours and subsequently washed thoroughly with water followed by calcination at 800 °C for 5 hours. BN aggregate filling remained after this process. These aggregates likely act as a defect and is responsible for a significant portion of the  $\text{Sb}_2\text{S}_3$ -filled samples being  $\alpha\text{-Sb}_2\text{S}_3$ .

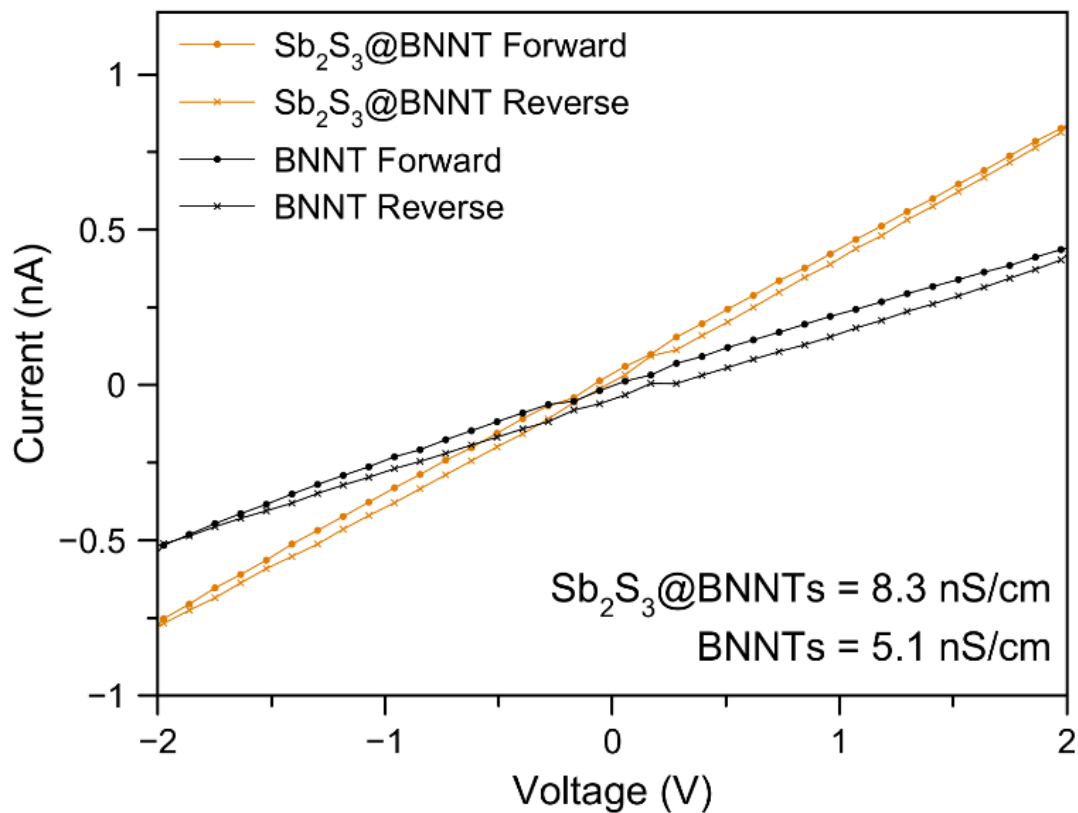

**Figure S13.** Conductivity measurements of Sb<sub>2</sub>S<sub>3</sub>@BNNT and BNNT pressed pellets. Sb<sub>2</sub>S<sub>3</sub>@BNNT: l=0.168 cm, A=0.269 x 0.0295 cm = 0.00796 cm<sup>2</sup>; empty BNNT: l=0.136 A=0.264 x 0.0242 cm = 0.00637 cm<sup>2</sup>

## References

- (1) Hanwell, M. D.; Curtis, D. E.; Lonie, D. C.; Vandermeersch, T.; Zurek, E.; Hutchison, G. R. Avogadro: An Advanced Semantic Chemical Editor, Visualization, and Analysis Platform. *J. Cheminformatics* **2012**, *4* (1), 17. <https://doi.org/10.1186/1758-2946-4-17>.
- (2) Humphrey, W.; Dalke, A.; Schulten, K. VMD: Visual Molecular Dynamics. *J. Mol. Graph.* **1996**, *14* (1), 33–38, 27–28. [https://doi.org/10.1016/0263-7855\(96\)00018-5](https://doi.org/10.1016/0263-7855(96)00018-5).
- (3) Bayliss, P.; Nowacki, W. Refinement of the Crystal Structure of Stibnite,  $\text{Sb}_2\text{S}_3$ . *Z. Für Krist.* **1972**, *135* (3–4), 308–315. <https://doi.org/10.1524/zkri.1972.135.3-4.308>.
- (4) Schindelin, J.; Arganda-Carreras, I.; Frise, E.; Kaynig, V.; Longair, M.; Pietzsch, T.; Preibisch, S.; Rueden, C.; Saalfeld, S.; Schmid, B.; Tinevez, J.-Y.; White, D. J.; Hartenstein, V.; Eliceiri, K.; Tomancak, P.; Cardona, A. Fiji: An Open-Source Platform for Biological-Image Analysis. *Nat. Methods* **2012**, *9* (7), 676–682. <https://doi.org/10.1038/nmeth.2019>.
- (5) Peters, J. J. P. A Fast Frozen Phonon Algorithm Using Mixed Static Potentials. *Ultramicroscopy* **2021**, *229*, 113364. <https://doi.org/10.1016/j.ultramic.2021.113364>.
- (6) Duncan, D. R. The Colour of Pigment Mixtures. *Proc. Phys. Soc.* **1940**, *52* (3), 390. <https://doi.org/10.1088/0959-5309/52/3/310>.
- (7) Clark, S. J.; Segall, M. D.; Pickard, C. J.; Hasnip, P. J.; Probert, M. I. J.; Refson, K.; Payne, M. C. First Principles Methods Using CASTEP. *Z. Für Krist. - Cryst. Mater.* **2005**, *220* (5–6), 567–570. <https://doi.org/10.1524/zkri.220.5.567.65075>.
- (8) Perdew, J. P.; Burke, K.; Ernzerhof, M. Generalized Gradient Approximation Made Simple. *Phys. Rev. Lett.* **1996**, *77* (18), 3865–3868. <https://doi.org/10.1103/PhysRevLett.77.3865>.
- (9) Grimme, S. Semiempirical GGA-type density functional constructed with a long-range dispersion correction. *J. Comput. Chem.* **2006**, *27* (15), 1787–1799. <https://doi.org/10.1002/jcc.20495>.
- (10) Sanville, E.; Kenny, S. D.; Smith, R.; Henkelman, G. Improved grid-based algorithm for Bader charge allocation. *J. Comput. Chem.* **2007**, *28* (5), 899–908. <https://doi.org/10.1002/jcc.20575>.
- (11) Tang, W.; Sanville, E.; Henkelman, G. A Grid-Based Bader Analysis Algorithm without Lattice Bias. *J. Phys. Condens. Matter* **2009**, *21* (8), 084204. <https://doi.org/10.1088/0953-8984/21/8/084204>.
- (12) Biesinger, M. C. Accessing the Robustness of Adventitious Carbon for Charge Referencing (Correction) Purposes in XPS Analysis: Insights from a Multi-User Facility Data Review. *Applied Surface Science* **2022**, *597*, 153681. <https://doi.org/10.1016/j.apsusc.2022.153681>.
